# Supplementary material
Source: PubMed Central journal article supplement (PMC3704039)
Supplement: 1304080110_pnas.201304080SI.pdf [file 1304080110_pnas.201304080SI.pdf]

# Supporting Information

Stouf et al. 10.1073/pnas.1304080110

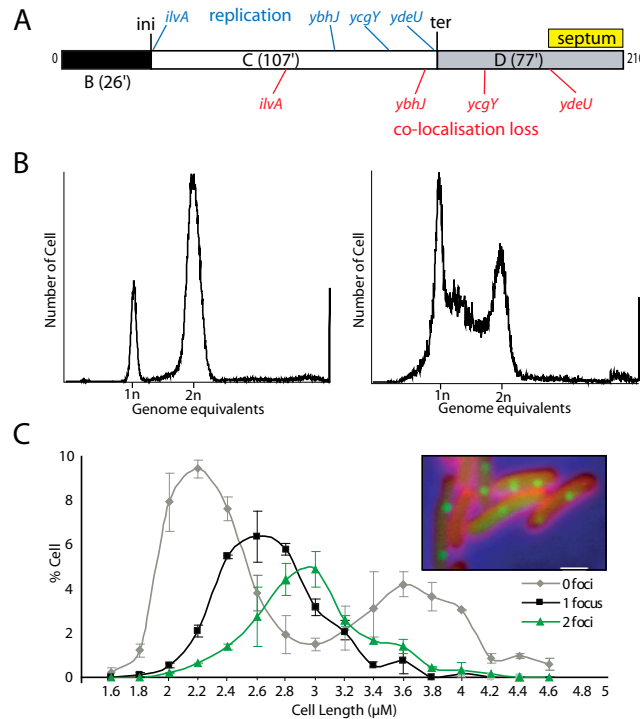

**Fig. S1.** Cell cycle of strain LN2666. (A–C) Cell-cycle periods were calculated from the doubling time of strain LN2666 (Table S1) grown in M9-alanine medium (DT, 210 min) (A), the flow cytometry patterns shown in B, and the number of SSB-Ypet foci in individual cells shown in C. *ini*, mean time of replication initiation; *ter*, mean time of replication termination. (A) The mean number of replication origins per cell ( $n_{ori}$ ) was counted after rifampicin/cephalexin treatment of exponentially growing cells (B at left of bar). The C+D period was calculated as  $(DT \times \ln(n_{ori})/\ln 2)$ . The duration of the C period was estimated from the pattern of SSB-Ypet foci in both snapshot (C) and time-lapse analysis. Cell-cycle periods were in good agreement with those previously published for strain MG1655 in these growth conditions (1). The mean times of loci replication (indicated in blue) were calculated from their distance to *oriC* and the replication fork velocity inferred from the duration of the C period (0.36 kb/s). The mean times of sister loci colocalization loss were calculated from the mean number of foci per cell ( $n_f$ ) as  $t = DT \times \ln(n_f)/\ln 2$ , where  $t$  is the time separating cell division from colocalization loss. The time of septum constriction (yellow bar) was calculated from the ratio of cells harboring a constricting septum using the same formula. (B) For flow cytometry analysis, cells were grown in M9-alanine medium at 30 °C to  $OD_{600} = 0.2$ . Rifampicin (300  $\mu\text{g}/\text{mL}$ ) and cephalexin (10  $\mu\text{g}/\text{mL}$ ) were added when needed, followed by 4-h incubation. Cells then were fixed using cold ethanol [74% (vol/vol) final concentration] and stored at 4 °C. Fixed cells were washed twice with 100  $\mu\text{L}$  of cold staining buffer (10 mM Tris, pH7.4, 10 mM  $\text{MgCl}_2$ ), and 400  $\mu\text{L}$  of a 0.4% Syto16 solution (Invitrogen) was added for 1 min before analysis using a BD FACSCalibur flow cytometer. Genome equivalents were determined using cells in stationary phase. Acquisitions were done using CellQuest Pro software. (C) Cells containing a SSB-Ypet fusion were classified depending on their number of foci and binned in 2-mM cell length classes. The percentage of cells in each class (y-axis) was plotted against cell length (x-axis).

1. Michelsen O, Teixeira de Mattos MJ, Jensen PR, Hansen FG (2003) Precise determinations of C and D periods by flow cytometry in *Escherichia coli* K-12 and B/r. *Microbiology* 149(Pt 4): 1001–1010.

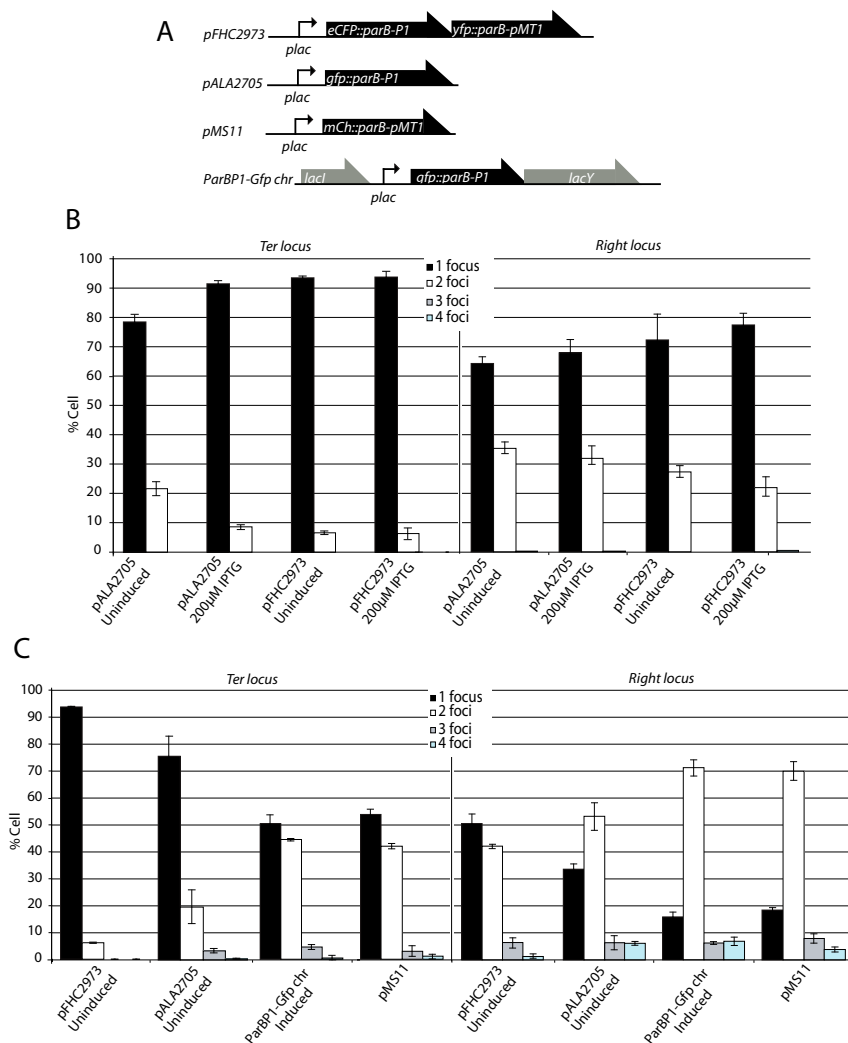

**Fig. S2.** Comparison of loci visualization systems. (A) Plasmids and chromosomal constructs producing ParB-fusion proteins. (B and C) Percentage of cells harboring the indicated number of foci of the *ydjG* (*ter*) and *yhjC* (*right*) loci tagged with *parS*<sub>pMT1</sub> (pMS11) or *parS*<sub>P1</sub> (other lanes), when visualized using the different localization systems shown in A. (B) Cells were grown in M9 medium containing alanine as a carbon source (0.2%), thiamine (1 µg/mL), thymine (2 µg/mL), and leucine (2 µg/mL). (C) Cells were grown in the same medium, except that glycerol (0.2%) and casamino acids (0.2% final concentration) replaced alanine as a carbon source.

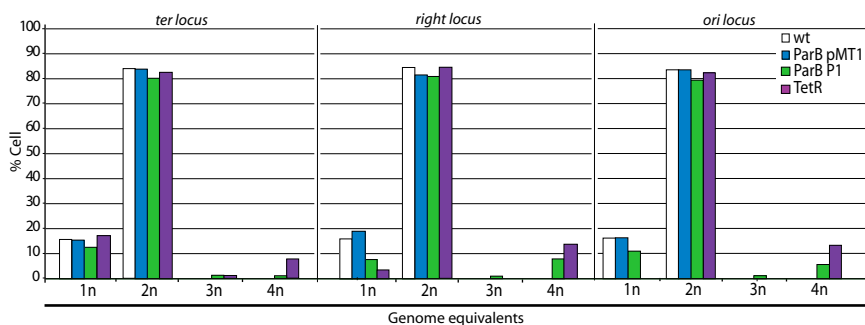

**Fig. S3.** Effects of loci visualization systems on the cell cycle. Wild-type LN2666 (open bars) and strains with a *ter* (*ydjG*), *right* (*ybhJ*), or *ori* (*ilvA*) locus tagged with the indicated systems were grown in M9-alanine medium to exponential phase. Inductors were added as indicated in *Materials and Methods*; then cells were treated with cephalixin and rifampicin for 3 h before flow cytometry analysis (see Fig. S1). The percentages of cells harboring the indicated genome equivalents are plotted.

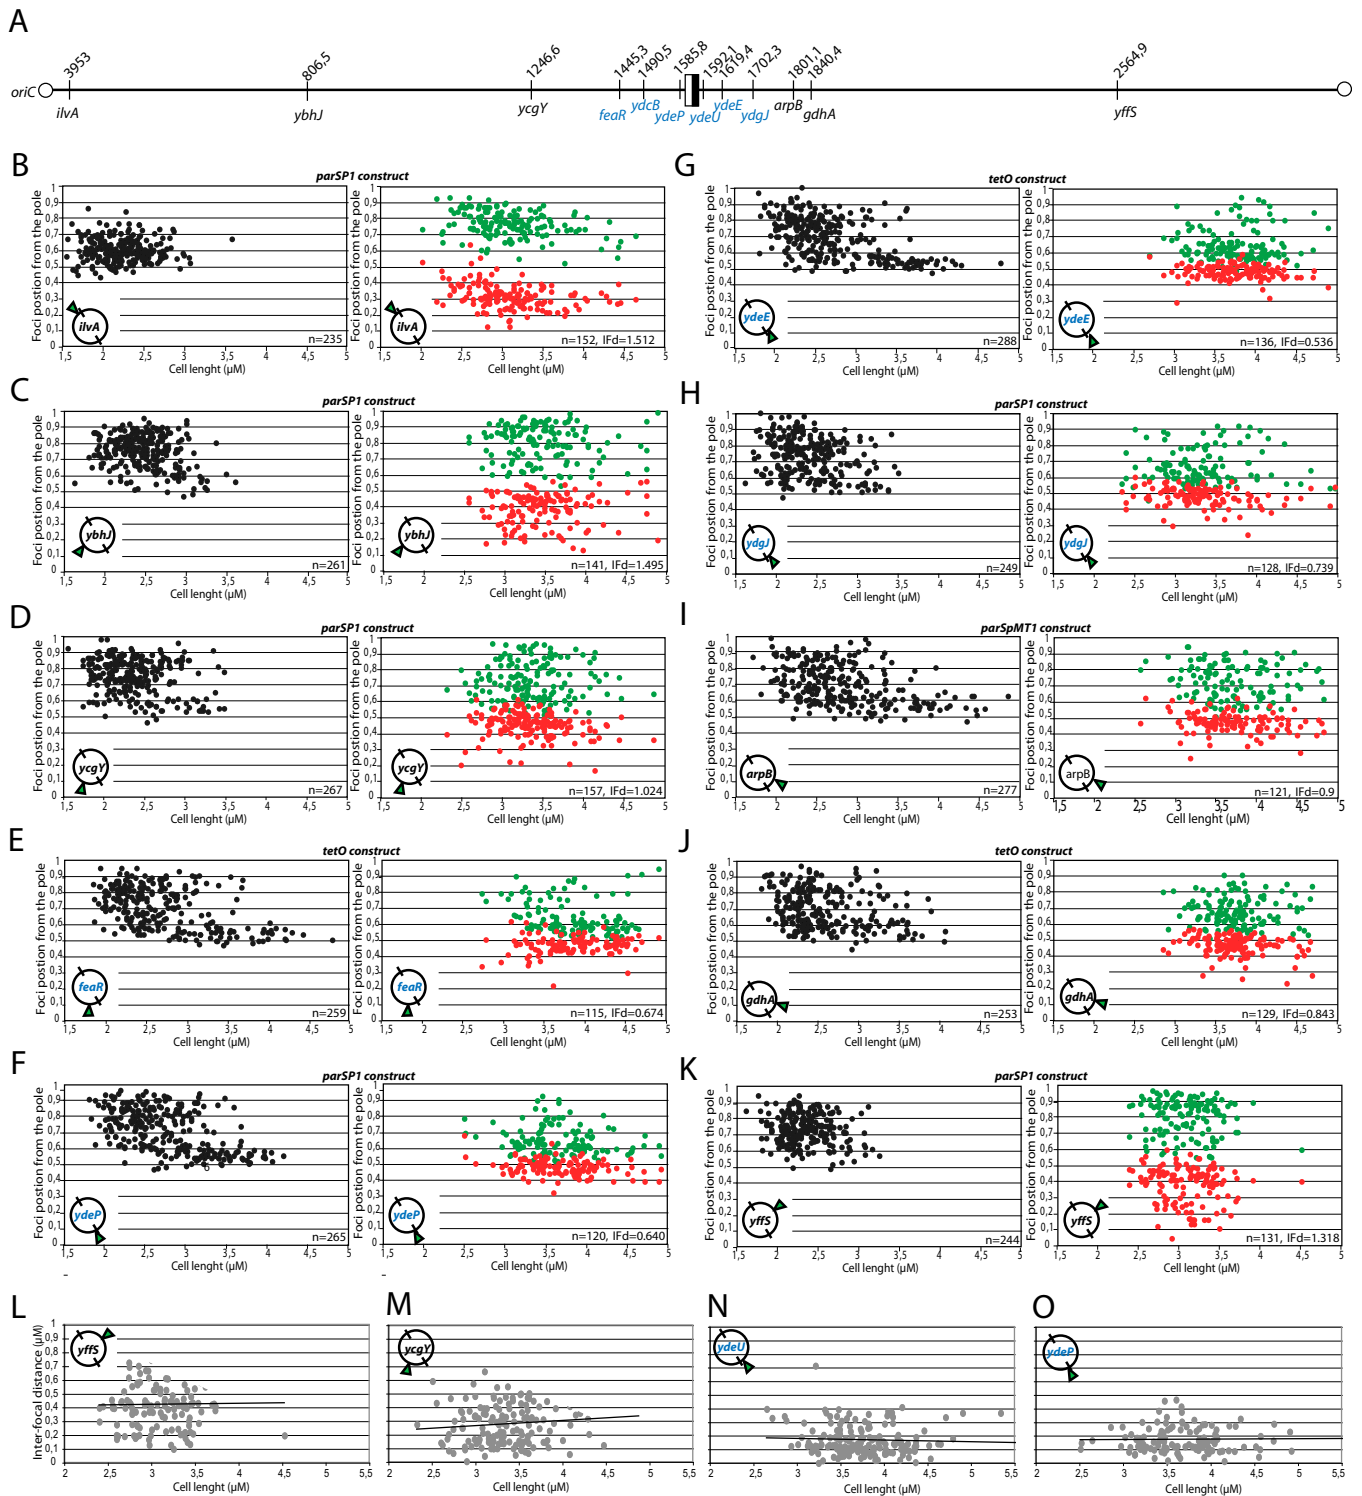

**Fig. S4.** Positioning of chromosome loci. (A) Map of the loci used, with coordinates indicated (see also Table S3). The black and white box represents the *dif* site, and the open circle represents the replication origin. Loci inside the region of high FtsK activity are shown in blue (1). (B–K) Position of the indicated foci of loci tagged with the indicated system from their farthest pole (y-axis) as a function of cell length (x-axis). (Left) Cells with a single focus (black dots). (Right) Cells with two foci (red and green dots). Loci positions are drawn on a circular chromosome map. The number of cells analyzed (*n*) and the mean interfocal distance for cells with two foci (IFd) are indicated. (L–O) The interfocal distance in cells with two foci (y-axis) was plotted as a function of cell length for the indicated loci (x-axis).

1. Deghorain M, et al. (2011) A defined terminal region of the E. coli chromosome shows late segregation and high FtsK activity. *PLoS ONE* 6(7):e22164.

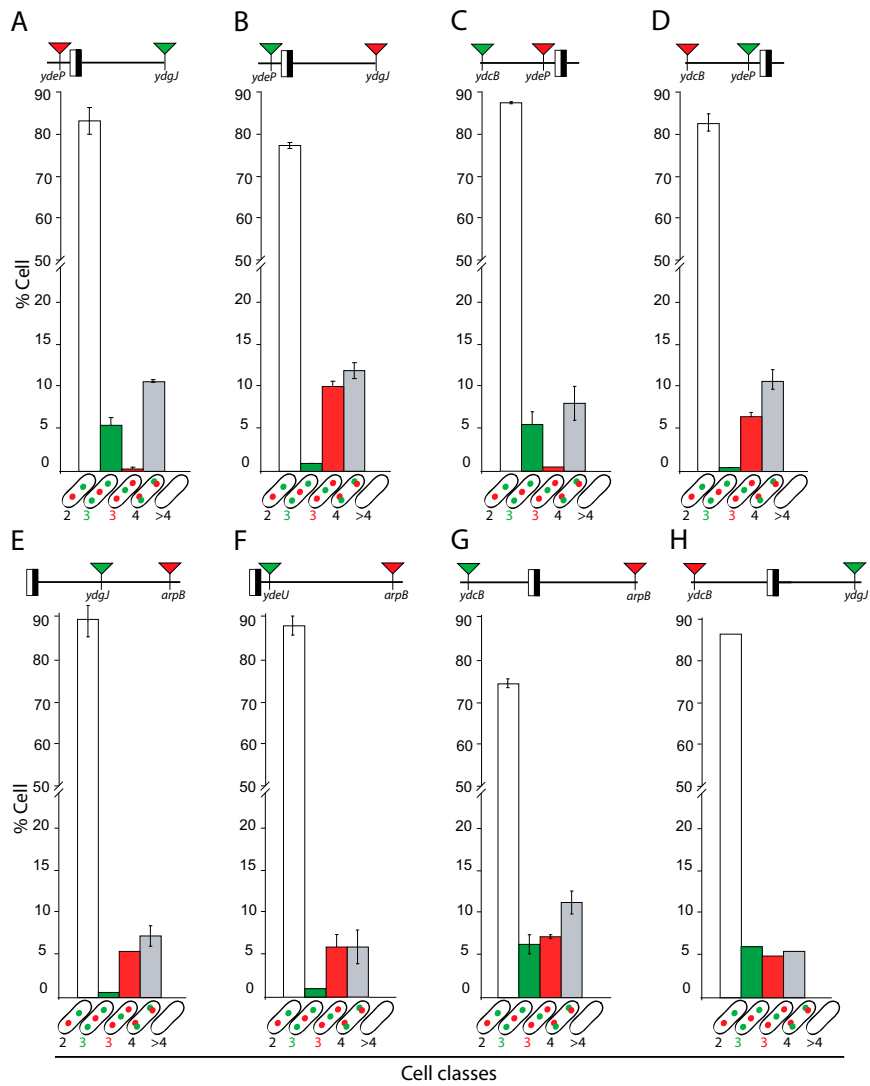

**Fig. S5.** Order of segregation of *ter* loci in wild-type strains. (A–H) Tagged loci are indicated with their position relative to *dif* (the black and white box). Red arrowheads indicate a *par*<sub>S<sub>PMT1</sub> tag, and green arrowheads indicate a *par*<sub>S<sub>P</sub> tag. Cells were classified by the number of foci of each locus (shown in cartoons on the x-axis; the empty cell indicates cells that fall in none of the first four categories). Bars show the mean percentage of each category in the population (y-axis) with individual measured ranges. Data reflect at least two independent experiments and more than 600 cells.</sub></sub>

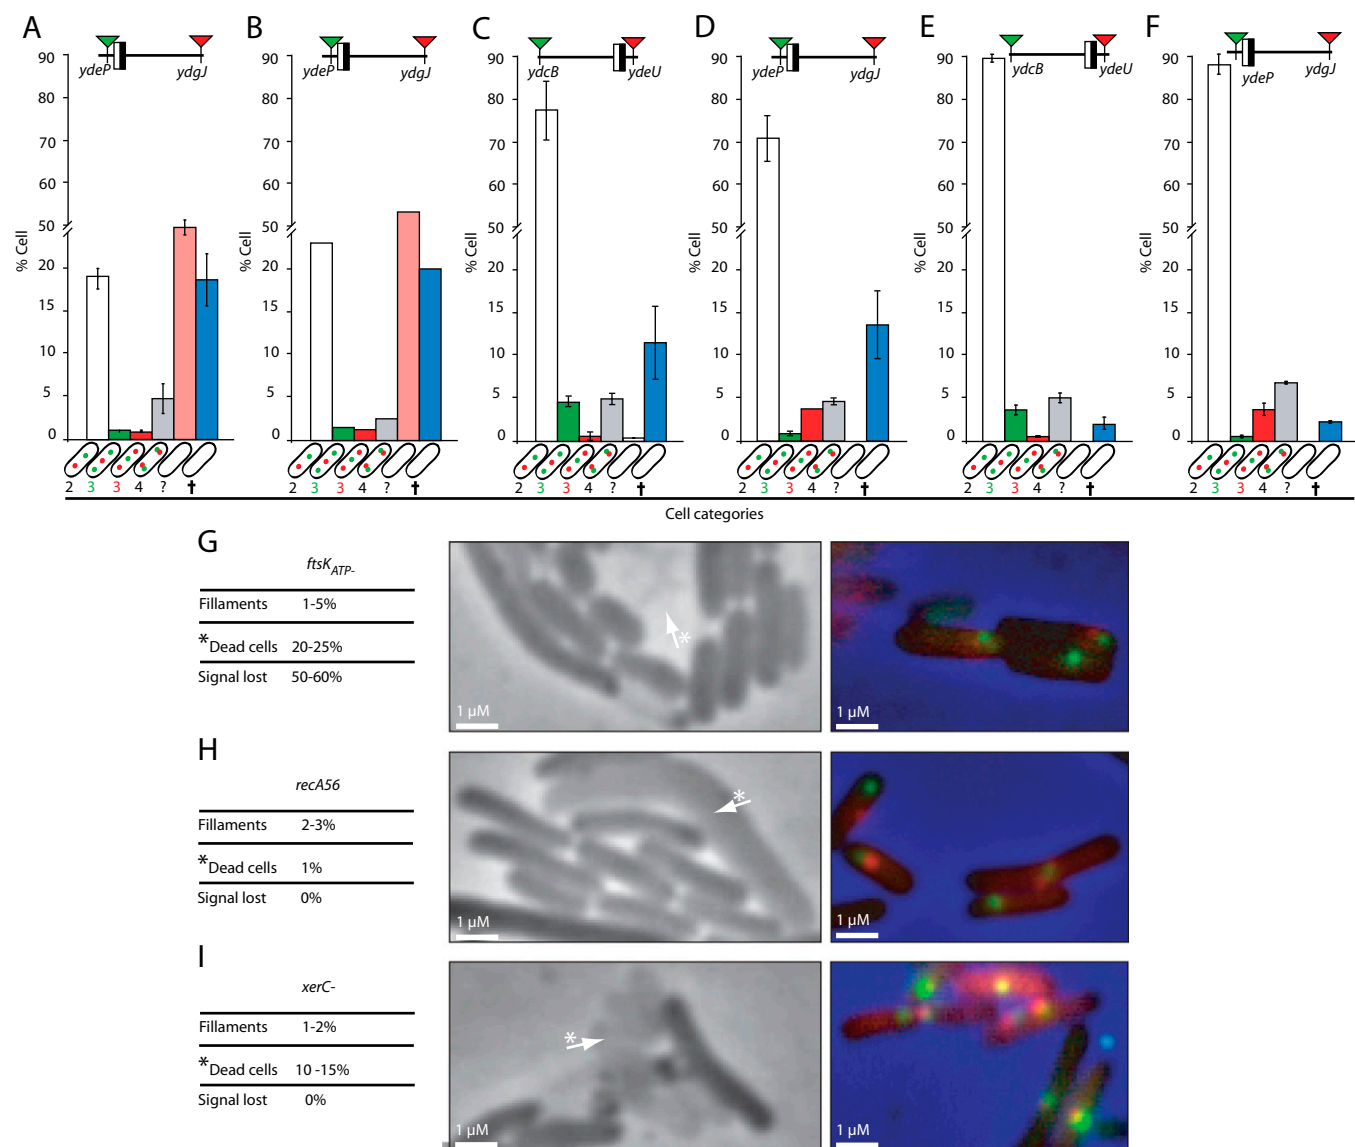

**Fig. S6.** Order of segregation of *ter* loci in strains carrying mutations. (A–F) Tagged loci are indicated with their position relative to *dif* (the black and white box). Red arrowheads indicate a *parS<sub>PMT1</sub>* tag, and green arrowheads indicate a *parS<sub>P1</sub>* tag. Cells were classified by the number of foci of each locus (shown in cartoons on the x-axis; the empty cell indicates cells that fall in none of the first four categories; blue bars indicate dead cells). Bars show the mean percentage of each category in the population (y-axis) with individual measured ranges. Data reflect at least two independent experiments and more than 600 cells. (A) *ftsK<sub>ATP</sub>* strain. (B)  $\Delta(ftsK_C)$  strain. (C and D) *xerC*<sup>-</sup> strains. (E and F) *xerC*<sup>-</sup> *recA*<sup>-</sup> strains. (G and H) Analysis of micrographs of strains carrying the indicated mutation with chosen examples. Fluorescent signals were absent in about half cells in *ftsK<sub>ATP</sub>*- and  $\Delta(ftsK_C)$  strains (most cells correspond to the salmon bar in A and B). Examples of dead (empty) cells are indicated by the white arrows.

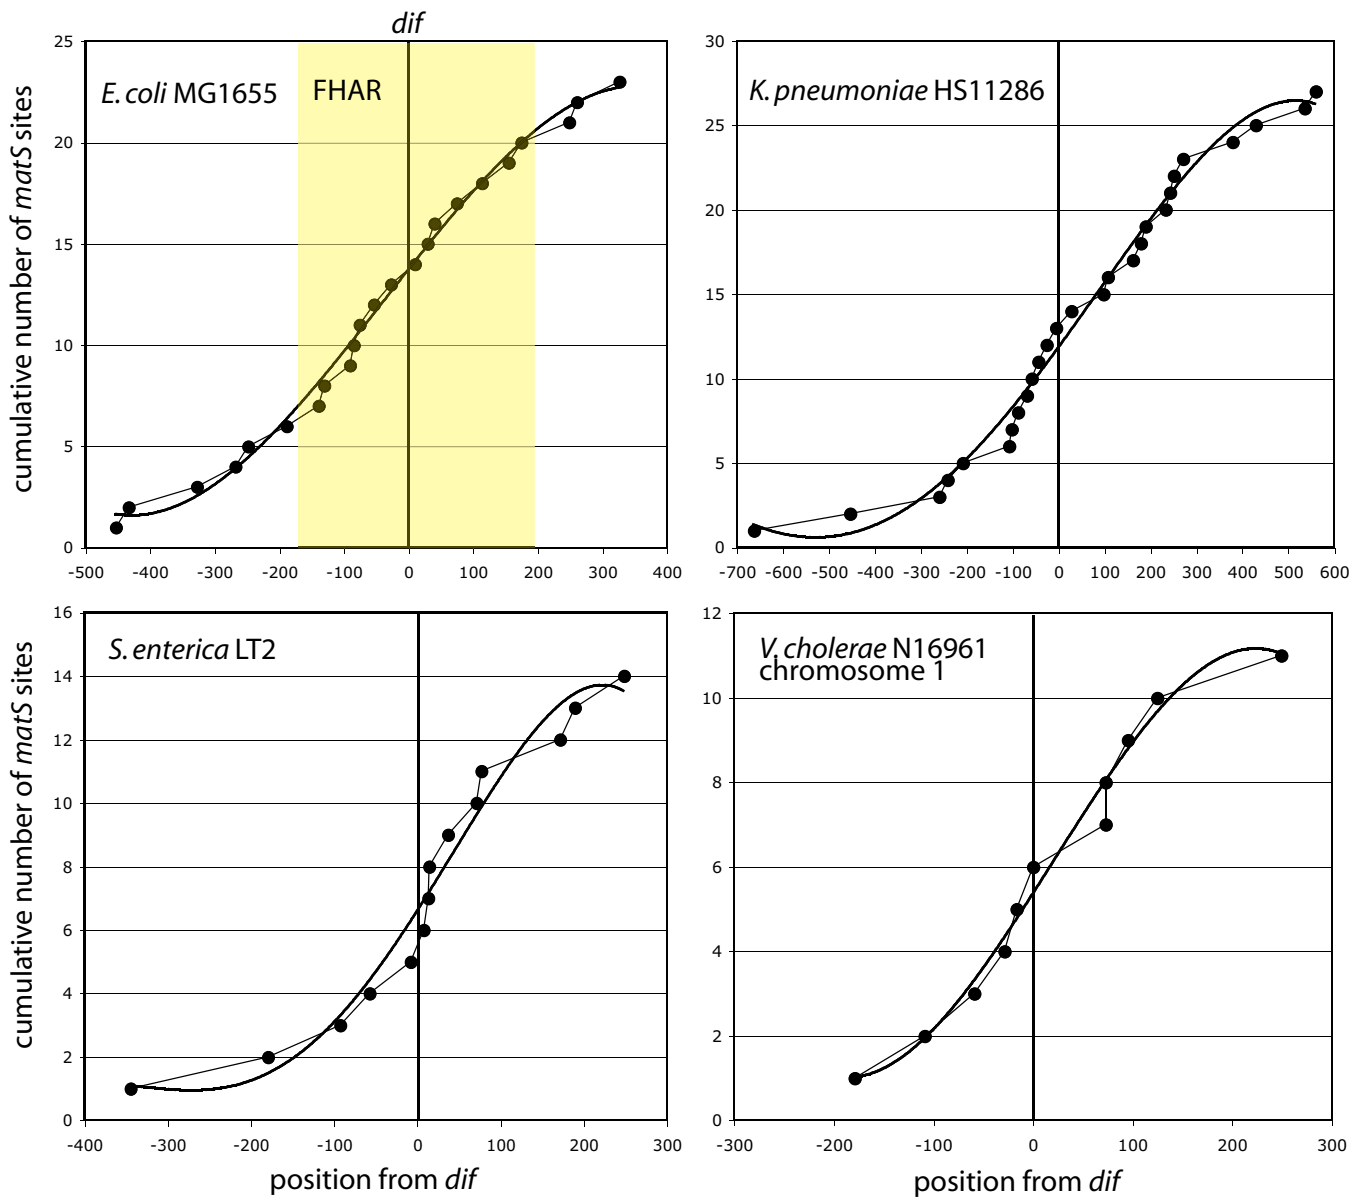

**Fig. S7.** Repartition of *matS* sites in *ter* regions. Panels show cumulative plots of *matS* sites (GTGACYNRGTCAC) in the chromosomal *ter* regions of the indicated bacteria (y-axis) as a function of their distance from the *dif* site (x-axis). Cumulative plots fit the sigmoid curves shown better than linear curves, indicating that *matS* sites tend to cluster in restricted regions around *dif*. In the case of *Escherichia coli* MG1655, the region of higher slope corresponds to the FtsK high-activity region (FHAR, shown in yellow).

**Table S1. Strains used**

| Strain                      | Relevant genotype                                                       | Comments                                                                                                                      |
|-----------------------------|-------------------------------------------------------------------------|-------------------------------------------------------------------------------------------------------------------------------|
| Reference strains           |                                                                         |                                                                                                                               |
| LN2666                      | W1485 W1485 F- leu thyA thi deoB or C supE rpsL (StR)                   | Wild-type strain (1)                                                                                                          |
| MS112                       | LN2666 del(lacZ)::gfp-parBP1                                            | Integration of gfp-parB P1 using pMS8*                                                                                        |
| MS154                       | LN2666 del(araB)::tetR-gfp                                              | Transfer of tetR-gfp (Gift from Jean-Yves Bouet, Centre National de la Recherche Scientifique, Toulouse, France) <sup>†</sup> |
| JCT9                        | LN2666 SSB-Ypet                                                         | Transfer of ssb-Ypet (2)                                                                                                      |
| Single-locus tagged strains |                                                                         |                                                                                                                               |
| MS158                       | MS112 inter(ilvA;ilvY)::parS P1-Kn                                      | Integration of parS P1 at the ilvA-ilvY locus using pMS59*                                                                    |
| MS159                       | MS112 inter(yffS;eutA)::parS P1-Kn                                      | Integration of parS P1 at the yffS-eutA locus using pMS56*                                                                    |
| MS182                       | MS112 inter(ybhJ;ybhC)::parS P1-Kn                                      | Integration of parS P1 at the ybhJ-ybhC locus using pMS58*                                                                    |
| MS165                       | MS154 inter(ybhJ;ybhC)::tetO-Gm                                         | Integration of tetO arrays at the ybhJ-ybhC locus using pMS53*                                                                |
| MS144                       | MS112 inter(ycgY;treA)::parS P1-Kn                                      | Integration of parS P1 at the ycgY-treA locus using pMS55*                                                                    |
| MS167                       | MS154 inter(ycgY;treA)::tetO-Gm                                         | Integration of tetO arrays at the ycgY-treA locus using pMS49*                                                                |
| MS168                       | MS154 inter(ydbL;feaR)::tetO-Gm                                         | Integration of tetO arrays at the ydbL-feaR locus using pMS47*                                                                |
| MS447                       | MS112 inter(ydcB;trg)::parS P1                                          | Integration of parS P1 at the ydcB-trg locus using $\lambda$ Red Recombination <sup>+,5</sup>                                 |
| MS11                        | LN2666 inter(ydcB;trg)::parS pMT1                                       | Integration of parS pMT1 at the ydcB-trg locus using $\lambda$ Red Recombination <sup>+,5</sup>                               |
| MS471                       | MS112 inter(ydeP;ydeQ)::parS P1                                         | Integration of parS P1 at the ydeP-ydeQ locus using $\lambda$ Red Recombination <sup>+,5</sup>                                |
| MS3                         | LN2666 inter(ydeP;ydeQ)::parS pMT1                                      | Integration of parS pMT1 at the ydeP-ydeQ locus using $\lambda$ Red Recombination <sup>+,5</sup>                              |
| MS472                       | MS112 inter(ydeU;ydeK)::parS P1                                         | Integration of parS P1 at the hipB-ydeU locus using $\lambda$ Red Recombination <sup>+,5</sup>                                |
| MS5                         | LN2666 inter(ydeU;ydeK)::parS pMT1                                      | Integration of parS pMT1 at the ydeU-ydeK locus using $\lambda$ Red Recombination <sup>+,5</sup>                              |
| MS163                       | MS154 inter(ydeE;ydeH)::tetO-Gm                                         | Integration of tetO arrays at the ydeE-ydeH locus using pMS46*                                                                |
| MS146                       | MS112 inter(ydgJ;ydgT)::parS P1-Kn                                      | Integration of parS P1 at the ydgJ-ydgT locus using $\lambda$ Red Recombination <sup>+</sup>                                  |
| MS164                       | MS154 inter(ydgJ;ydgT)::tetO-Gm                                         | Integration of tetO arrays at the ydgJ-ydgT locus using pMS48*                                                                |
| MS15                        | LN2666 inter(ydgJ;ydgT)::parS pMT1                                      | Integration of parS pMT1 at the ydgJ-ydgT locus using $\lambda$ Red Recombination <sup>+,5</sup>                              |
| MS166                       | MS154 inter(gdhA;ynjL)::tetO-Gm                                         | Integration of tetO arrays at the gdhA-ynjL locus using pMS50*                                                                |
| MS294                       | MS112 inter(ydgJ;ydgT)::parS pMT1 + pMS11                               | Integration of parS pMT1 at the ydgJ-ydgT locus using $\lambda$ Red Recombination <sup>+,5</sup>                              |
| MS406                       | MS112 inter(ybhJ;ybhC)::parS pMT1 + pMS11                               | Integration of parS pMT1 at the ybhC-ybhJ locus using $\lambda$ Red Recombination <sup>+,5</sup>                              |
| MS322                       | LN2666 inter(ybhJ;ybhC)::parS P1 + pFHC2973                             | Transfer of parS P1 from MS182 in LN2666 <sup>+,5</sup> , Transformation with pFHC2973                                        |
| MS323                       | LN2666 inter(ybhJ;ybhC)::parS P1 + pALA2705                             | Transfer of parS P1 from MS182 in LN2666 <sup>+,5</sup> , Transformation with pALA2705                                        |
| MS324                       | LN2666 inter(ydgJ;ydgT)::parS P1 + pFHC2973                             | Transfer of parS P1 from MS146 in LN2666 <sup>+,5</sup> , Transformation with pFHC2973                                        |
| MS325                       | LN2666 inter(ydgJ;ydgT)::parS P1 + pALA2705                             | Transfer of parS P1 from MS146 in LN2666 <sup>+,5</sup> , Transformation with pALA2705                                        |
| MS560                       | LN2666 inter(ydgJ;ydgT)::parS P1-Kn + ssb-mCherry FRT-Cm-FRT            | Transfer of ssb-mCherry (Gift from Jean-Yves Bouet, Toulouse) to MS146 <sup>†</sup>                                           |
| MS561                       | LN2666 inter(ycgY;treA)::parS P1-Kn + ssb-mCherry FRT-Cm-FRT            | Transfer of ssb-mCherry (Gift from Jean-Yves Bouet, Toulouse) in MS144 <sup>†</sup>                                           |
| Double-loci tagged strains  |                                                                         |                                                                                                                               |
| MS291                       | MS112 inter(ilvA;ilvY)::parS P1-Kn, inter(ydeU;ydeK)::parS pMT1 + pMS11 | Transfer of parS pMT1 from MS5 in MS158 <sup>+,5</sup> , Transformation with pMS11                                            |
| MS297                       | MS112 inter(yffS;eutA)::parS P1-Kn, inter(ydeU;ydeK)::parS pMT1 + pMS11 | Transfer of parS pMT1 from MS5 in MS159 <sup>+,5</sup> , Transformation with pMS11                                            |
| MS292                       | MS112 inter(ybhJ;ybhC)::parS P1-Kn, inter(ydeU;ydeK)::parS pMT1 + pMS11 | Transfer of parS pMT1 from MS5 in MS182 <sup>+,5</sup> , Transformation with pMS11                                            |



Table S1. Cont.

| Strain                                               | Relevant genotype                                                                                  | Comments                                                                            |
|------------------------------------------------------|----------------------------------------------------------------------------------------------------|-------------------------------------------------------------------------------------|
| MS279                                                | MS112 inter(ycgY;treA)::parS P1-Kn, inter(ydeU;ydeK)::parS pMT1 + pMS11                            | Transfer of parS pMT1 from MS5 in MS144 <sup>†,§</sup> , Transformation with pMS11  |
| MS281                                                | MS112 inter(ydgJ;ydgT)::parS P1-Kn, inter(ydeU;ydeK)::parS pMT1 + pMS11                            | Transfer of parS pMT1 from MS5 in MS146 <sup>†,§</sup> , Transformation with pMS11  |
| MS425                                                | MS112 inter(trg;ydcI)::parS P1, inter(ydeU;ydeK)::parS pMT1 + pMS11                                | Transfer of parS pMT1 from MS5 in MS447 <sup>†,§</sup> , Transformation with pMS11  |
| MS71                                                 | MS112 inter(trg;ydcI)::parS pMT1, inter(ydeU;ydeK)::parS P1 + pMS11                                | Transfer of parS pMT1 from MS11 in MS472 <sup>†,§</sup> , Transformation with pMS11 |
| MS402                                                | MS112 inter(ydeP;ydeQ)::parS P1, inter(ydgJ;ydgT)::parS pMT1 + pMS11                               | Transfer of parS pMT1 from MS15 in MS471 <sup>†,§</sup> , Transformation with pMS11 |
| MS83                                                 | MS112 inter(ydeP;ydeQ)::parS pMT1, inter(ydgJ;ydgT)::parS P1 + pMS11                               | Transfer of parS pMT1 from MS3 in MS144 <sup>†,§</sup> , Transformation with pMS11  |
| MS107                                                | MS112 inter(ydeU;ydeK)::parS P1, inter(ydgJ;ydgT)::parS pMT1 + pMS11                               | Transfer of parS pMT1 from MS15 in MS472 <sup>†,§</sup> , Transformation with pMS11 |
| MS89                                                 | MS112 inter(ydeP;ydeQ)::parS P1, inter(trg, ydcI)::parS pMT1 + pMS11                               | Transfer of parS pMT1 from MS11 in MS471 <sup>†,§</sup> , Transformation with pMS11 |
| MS95                                                 | MS112 inter(ydeP;ydeQ)::parS pMT1, inter(trg, ydcI)::parS pMT1 + pMS11                             | Transfer of parS pMT1 from MS11 in MS447 <sup>†,§</sup> , Transformation with pMS11 |
| Strains carrying ftsK, recA, xerC, or matP mutations |                                                                                                    |                                                                                     |
| MS450                                                | MS112 inter(trg;ydcI)::parS P1, inter(ydeU;ydeK)::parS pMT1, matP::FRT-Kn-FRT + pMS11              | Transfer of matP FRT-Kn-FRT from JW0939 of the KEIO collection <sup>†,§,¶</sup>     |
| MS451                                                | MS112 inter(ydeP;ydeQ)::parS P1, inter(ydgJ;ydgT)::parS pMT1, matP::FRT-Kn-FRT + pMS11             | Transfer of matP FRT-Kn-FRT <sup>†,§</sup>                                          |
| MS367                                                | MS112 inter(ycgY;treA)::parS P1, inter(ydeU;ydeK)::parS pMT1, matP::FRT-Kn-FRT + pMS11             | Transfer of matP FRT-Kn-FRT <sup>†,§</sup>                                          |
| MS480                                                | MS112 inter(trg;ydcI)::parS P1, inter(ydeU;ydeK)::parS pMT1, ftsK-KOPSblind-Cm + pMS89             | Transfer of ftsK-KOPSblind-Cm from VSO4 (3) <sup>†,§</sup>                          |
| MS481                                                | MS112 inter(ydeP;ydeQ)::parS P1, inter(ydgJ;ydgT)::parS pMT1, ftsK-KOPSblind-Cm + pMS89            | Transfer of ftsK-KOPSblind-Cm from VSO4(3) <sup>†,§</sup>                           |
| MS253                                                | MS112 inter(ycgY;treA)::parS P1, inter(ydeU;ydeK)::parS pMT1, ftsK-KOPSblind-Cm + pMS89            | Transfer of ftsK-KOPSblind-Cm from VSO4(3) <sup>†,§</sup>                           |
| MS478                                                | MS112 inter(ydeU;ydeK)::parS pMT1, inter(ydgJ;ydgT)::parS P1, ftsK-KOPSblind-Cm + pMS89            | Transfer of ftsK-KOPSblind-Cm from VSO4(3) <sup>†,§</sup>                           |
| MS479                                                | MS112 inter(ydeU;ydeK)::parS P1, inter(ydgJ;ydgT)::parS pMT1, ftsK-KOPSblind-Cm + pMS89            | Transfer of ftsK-KOPSblind-Cm from VSO4(3) <sup>†,§</sup>                           |
| MS554                                                | MS112 inter(trg;ydcI)::parS P1, inter(ydeU;ydeK)::parS pMT1, recA56::Tc + pMS11                    | Transfer of recA56 <sup>  </sup>                                                    |
| MS555                                                | MS112 inter(ydeP;ydeQ)::parS P1, inter(ydgJ;ydgT)::parS pMT1, recA56::Tc + pMS11                   | Transfer of recA56 <sup>  </sup>                                                    |
| MS556                                                | MS112 inter(ycgY;treA)::parS P1-Kn, inter(ydeU;ydeK)::parS pMT1, recA56::Tc + pMS11                | Transfer of recA56 <sup>  </sup>                                                    |
| MS520                                                | MS112 inter(trg;ydcI)::parS P1, inter(ydeU;ydeK)::parS pMT1, xerC::FRT-kn-FRT + pMS11              | Transfer of xerC::FRT-kn-FRT from JW3784 <sup>†,¶</sup>                             |
| MS543                                                | MS112 inter(ydeP;ydeQ)::parS P1, inter(ydgJ;ydgT)::parS pMT1, xerC::FRT-kn-FRT + pMS11             | Transfer of xerC::FRT-kn-FRT from JW3784 <sup>†,¶</sup>                             |
| MS563                                                | MS112 inter(trg;ydcI)::parS P1, inter(ydeU;ydeK)::parS pMT1, xerC::FRT-kn-FRT, recA56::Tc + pMS11  | Transfer of recA56 <sup>  </sup>                                                    |
| MS564                                                | MS112 inter(ydeP;ydeQ)::parS P1, inter(ydgJ;ydgT)::parS pMT1, xerC::FRT-kn-FRT, recA56::Tc + pMS11 | Transfer of recA56 <sup>  </sup>                                                    |
| MS537                                                | MS112 inter(trg;ydcI)::parS P1, inter(ydeU;ydeK)::parS pMT1, ftsK ATP::cm + pMS89                  | Transfer of ftsK ATP- Cm(3) <sup>†</sup>                                            |
| MS538                                                | MS112 inter(ydeP;ydeQ)::parS P1, inter(ydgJ;ydgT)::parS pMT1, ftsK ATP::cm + pMS89                 | Transfer of ftsK ATP- Cm(3) <sup>†</sup>                                            |
| MS557                                                | MS112 inter(trg;ydcI)::parS P1, inter(ydeU;ydeK)::parS pMT1, ftsK delC::Tc + pMS11                 | Transfer of del(ftsK)::Tc (3) <sup>†</sup>                                          |
| MS540                                                | MS112 inter(ydeP;ydeQ)::parS P1, inter(ydgJ;ydgT)::parS pMT1, ftsK delC::Tc + pMS11                | Transfer of del(ftsK)::Tc (3) <sup>†</sup>                                          |

St, streptomycin resistance determinant; Kn, kanamycin resistance determinant; Gm, gentamycin resistant determinant; Cm, chloramphenicol resistance determinant; Tc, tetracyclin resistance determinant.

\*Transgenesis using plasmids of the pLN135 family used an integration-excision procedure described in ref. 1.

†Constructs tagged by resistance determinants were transferred by P1 transduction following standard procedures.

‡Red-mediated transgenesis was done in strain DY378 following standard procedures (5) and then were transferred to relevant strains by P1 transduction.

§Unless specified (parS P1-Kn), the parS P1-FRT-Cm-FRT and parS pMT1-FRT-Cm-FRT cassettes were first inserted or transferred into relevant strains, and then the Cm determinant was deleted using plasmid pCP20 (6).

¶The KEIO collection of E. coli gene deletion mutants is described in ref. 7.

||The recA56-null allele was cotransferred by conjugation with an srl::Tn10 insertion from strains JC10240 ((Hfr PO45 recA56 srl::Tn10 thr300 ilv318 rpl300; our strain collection).



1. Cornet F, Louarn J, Patte J, Louarn J (1996) Restriction of the activity of the recombination site dif to a small zone of the Escherichia coli chromosome. *Genes Dev* 10(9):1152–1161.
2. Reyes-Lamothe R, Possoz C, Danilova O, Sherratt D (2008) Independent positioning and action of Escherichia coli replisomes in live cells. *Cell* 133(1):90–102.
3. Sivanathan V, et al. (2009) KOPS-guided DNA translocation by FtsK safeguards Escherichia coli chromosome segregation. *Molecular Microbiology* 71(4):1031–1042.
4. Barre F, et al. (2000) FtsK functions in the processing of a Holliday junction intermediate during bacterial chromosome segregation. *Genes Dev* 14(23):2976–2988.
5. Yu D, et al. (2000) An efficient recombination system for chromosome engineering in Escherichia coli. *Proc Natl Acad Sci USA* 97(11):5978–5983.
6. Datsenko KA, Wanner BL (2000) One-step inactivation of chromosomal genes in Escherichia coli K-12 using PCR products. *Proc Natl Acad Sci USA* 97(12):6640–6645.
7. Baba T, et al. (2006) Construction of Escherichia coli K-12 in-frame, single-gene knockout mutants: The Keio collection. *Mol Syst Biol* 2:2006.0008.

**Table S2. Plasmids used**

| Plasmid        | Relevant genotype, construct                                             | Comments                                                                                                                             |
|----------------|--------------------------------------------------------------------------|--------------------------------------------------------------------------------------------------------------------------------------|
| pALA2705       | lacZp–gfp–parB P1, ApR                                                   | (1)                                                                                                                                  |
| pFHC2973       | lacZp–ecfp–parB P1–yfp–parB pMT1, ApR                                    | (1)                                                                                                                                  |
| pLN135         | pSC101 derived, repATs,rpsL+, CmR                                        | Transgenesis vector (2)                                                                                                              |
| pMS7           | pLN135 with an engineered lacI–lacY region deleted for lacZ              | For Plac-driven constructs at the lacZ locus                                                                                         |
| pMS8           | pMS7 with gfp–parB P1                                                    | For Integration of gfp–parB P1 at the lacZ locus or use for plasmid-driven expression                                                |
| pMS11          | pMS7 with mCherry–parB pMT1                                              | For Integration of mCherry parBpMT1 at the lacZ locus or use for plasmid-driven expression                                           |
| pMS89          | pMS11 with a Kn resistance determinant                                   | For plasmid-driven expression in Cmresistant strains                                                                                 |
| pMS1           | pUC57 (Genscript) with a modified multiple cloning site linker, ApR      | Cloning vector                                                                                                                       |
| pMS24          | pMS1 with a parS P1–Kn cassette                                          | Source of parS P1–Kn cassette                                                                                                        |
| pGKD3–parS P1  | pGB2 derivative carrying a parS P1–FRT–Cm–FRT cassette                   | Source of parS P1–FRT–Cm–FRT cassette (3)                                                                                            |
| pGKD3–paS pMT1 | pGB2 derivative carrying a parS pMT1–FRT–Cm–FRT cassette                 | Source of parS pMT1–FRT–Cm–FRT cassette (4)                                                                                          |
| pMS27          | pMS1 with a 4.8-kb fragment from pFX240 containing 192 tetO sites and Gm | Source of tetO–Gm cassette. pFX240 is a gift from F.-X. Barre (Centre National de la Recherche Scientifique, Gif-sur Yvette, France) |
| pMS34          | pLN135 with an engineered ydeE–ydeH locus                                | For cloning cassettes at the ydeE–ydeH locus                                                                                         |
| pMS35          | pLN135 with an engineered ydgJ–ydgT locus                                | For cloning cassettes at the ydgJ–ydgT locus                                                                                         |
| pMS38          | pLN135 with an engineered ycgY–treA locus                                | For cloning cassettes at the ycgY–treA locus                                                                                         |
| pMS29          | pLN135 with an engineered ydbL–feaR locus                                | For cloning cassettes at the ydbL–feaR locus                                                                                         |
| pMS42          | pLN135 with an engineered gdhA–ynjL locus                                | For cloning cassettes at the gdhA–ynjL locus                                                                                         |
| pMS43          | pLN135 with an engineered yffs–eutA locus                                | For cloning cassettes at the yffs–eutA locus                                                                                         |
| pMS44          | pLN135 with an engineered ilvA–ilvY locus                                | For cloning cassettes at the ilvA–ilvY locus                                                                                         |
| pMS45          | pLN135 with an engineered ybhC–ybhJ locus                                | For cloning cassettes at the ybhC–ybhJ locus                                                                                         |
| pMS46          | pMS34 with the tetO–Gm cassette                                          | For Integration of tetO–Gm at the ydeE–ydeH locus                                                                                    |
| pMS47          | pMS29 with the tetO–Gm cassette                                          | For Integration of tetO–Gm at the ydbL–feaR locus                                                                                    |
| pMS48          | pMS35 with the tetO–Gm cassette                                          | For Integration of tetO–Gm at the ydgJ–ydgT locus                                                                                    |
| pMS49          | pMS38 with the tetO–Gm cassette                                          | For Integration of tetO–Gm at the ycgY–treA locus                                                                                    |
| pMS50          | pMS42 with the tetO–Gm cassette                                          | For Integration of tetO–Gm at the gdhA–ynjL locus                                                                                    |
| pMS53          | pMS45 with the tetO–Gm cassette                                          | For Integration of tetO–Gm at the ybhJ–ybhC locus                                                                                    |
| pMS55          | pMS38 with parS P1–Kn cassette                                           | For Integration of parS P1–Kn at the ycgY–treA locus                                                                                 |
| pMS56          | pMS43 with parS P1–Kn cassette                                           | For Integration of parS P1–Kn at the yffs–eutA locus                                                                                 |
| pMS57          | pMS35 with parS P1–Kn cassette                                           | For Integration of parS P1–Kn at the ydgJ–ydgT locus                                                                                 |
| pMS58          | pMS45 with parS P1–Kn cassette                                           | For Integration of parS P1–Kn at the ybhC–ybhJ locus                                                                                 |
| pMS59          | pMS44 with parS P1–Kn cassette                                           | For Integration of parS P1–Kn at the ilvA–ilvY locus                                                                                 |

1. Nielsen HJ, Ottesen JR, Youngren B, Austin SJ, Hansen FG (2006) The Escherichia coli chromosome is organized with the left and right chromosome arms in separate cell halves. *Mol Microbiol* 62(2):331–338.
2. Cornet F, Louarn J, Patte J, Louarn J (1996) Restriction of the activity of the recombination site dif to a small zone of the Escherichia coli chromosome. *Genes Dev* 10(9):1152–1161.
3. Espeli O, Mercier R, Boccard F (2008) DNA dynamics vary according to macrodomain topography in the E. coli chromosome. *Mol Microbiol* 68(6):1418–1427.
4. Mercier R, et al. (2008) The MatP/matS site-specific system organizes the terminus region of the E. coli chromosome into a macrodomain. *Cell* 135(3):475–485.

**Table S3. Insertion used for loci positioning**

| Region       | Tagged loci*            | Insertion site <sup>†</sup>         | Site inserted                  |
|--------------|-------------------------|-------------------------------------|--------------------------------|
| <i>ori</i>   | <b><i>ilvA-ilvY</i></b> | 3,954,537 bp, GGCCTACCCG▼CGCGACAACG | parS-P1                        |
| <i>left</i>  | <b><i>yffS-eutA</i></b> | 2,563,422 bp, GCACCACAAT▼TACCCCAACC | parS-P1                        |
| <i>right</i> | <b><i>ybhJ-ybhC</i></b> | 805,098 bp, TAAGGCATTT▼TCGCAGCATC   | parS-P1, parS-pMT1, tetO array |
| <i>ter</i>   | <b><i>ycgY-treA</i></b> | 1,244,862 bp, ACAACGCCAT▼CCGGAGAAGC | parS-P1, parS-pMT1, tetO array |
| <i>ter</i>   | <b><i>ydbL-feaR</i></b> | 1,444,309 bp, AATATTCAA▲AACTCCTGTC  | tetO array                     |
| <i>ter</i>   | <b><i>ydcB-trg</i></b>  | 1,490,280 bp, CGAAAATAAT▼CACTTCACGA | parS-P1, parS-pMT1             |
| <i>ter</i>   | <b><i>ydeP-ydeQ</i></b> | 1,584,724 bp, TCTTACAGGT▼GTAGGCTAAT | parS-P1, parS-pMT1             |
| <i>ter</i>   | <b><i>ydeU-ydeK</i></b> | 1,592,139 bp, TTGCCGACTT▼CAAACGGCGC | parS-P1, parS-pMT1             |
| <i>ter</i>   | <b><i>ydeE-ydeH</i></b> | 1,620,588 bp, TCGTTTAGGT▼TACCTCTGCT | tetO array                     |
| <i>ter</i>   | <b><i>ydgJ-ydgT</i></b> | 1,702,639 bp, TGCTGGAGCT▼ATTATTGCTA | parS-P1, parS-pMT1, tetO array |
| <i>ter</i>   | <b><i>arpB-ydiY</i></b> | 1,803,178 bp, GAGATATGCA▼GGACACTGGT | parS-pMT1                      |
| <i>ter</i>   | <b><i>gdhA-ynjL</i></b> | 1,841,750 bp, GGCCTACAAA▼TGGGCACAAT | tetO array                     |

\*Sites were inserted in intergenic regions of converging genes and named after the first gene (bolded).

<sup>†</sup>The insertion coordinates are given (in bp) with the surrounding sequence (arrowheads show the insertion position).
